# Supplementary material
Source: Springer Nature journal article supplement (https://www.springermedizin.de/resource/supplementary/12872_2006_123_MOESM4_ESM.pdf/9431070)

1 Gy

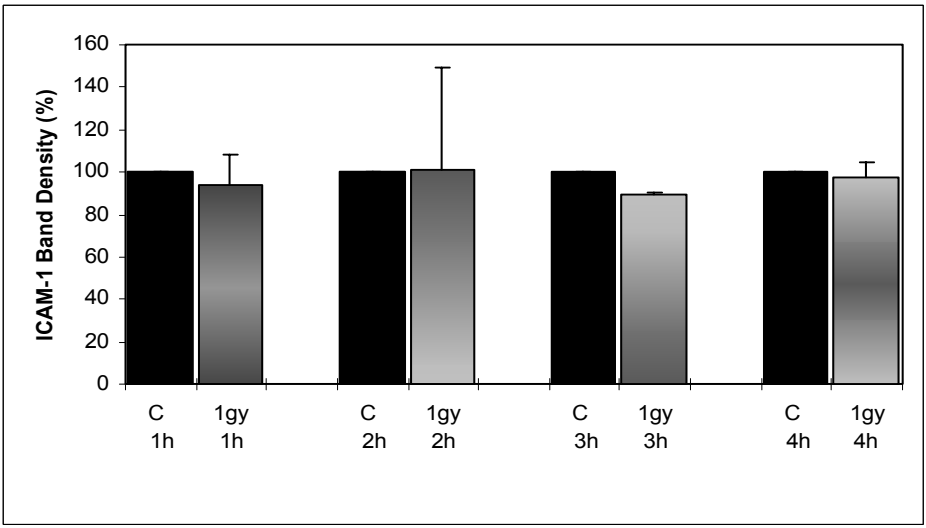

4 Gy

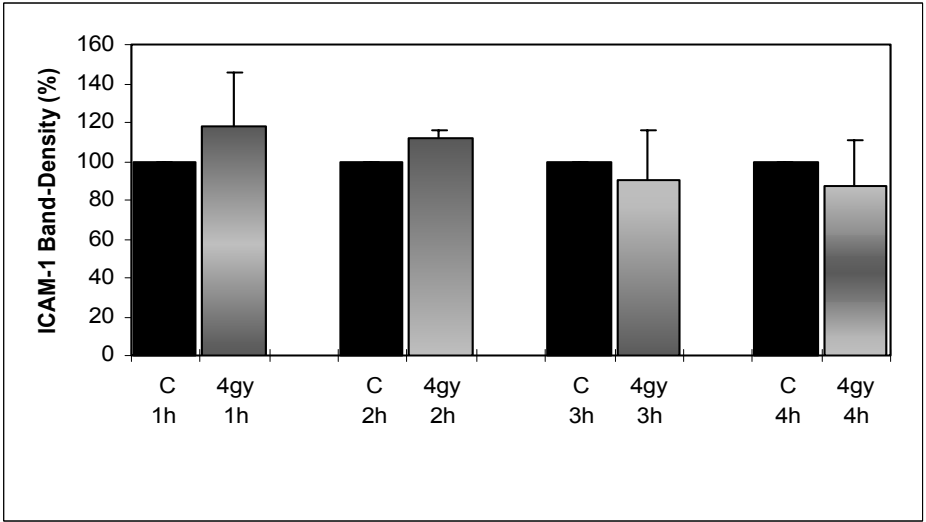

10 Gy

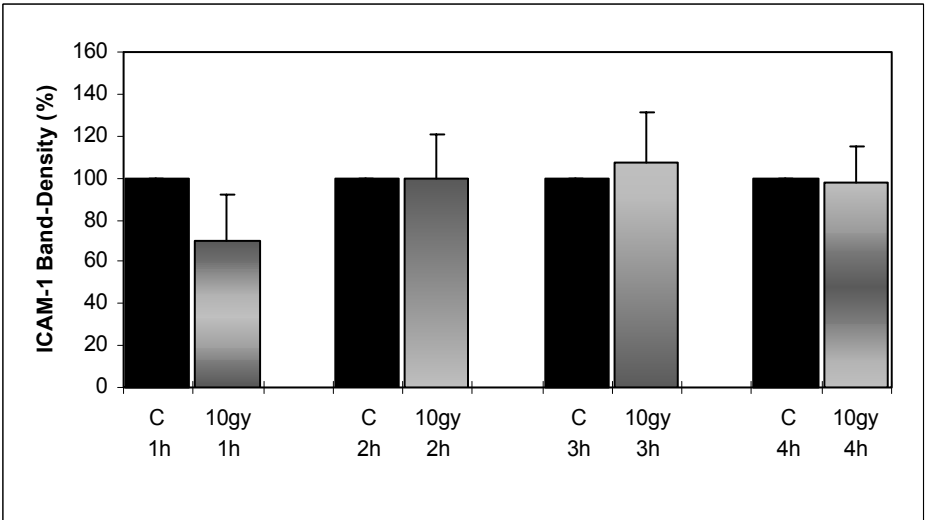

Supplement: MOESM4 [file 9431070]
